# Supplementary material for: Distinguishing between cancer cell differentiation and resistance induced by all-trans retinoic acid using transcriptional profiles and functional pathway analysis
Source: PubMed Central journal article supplement — Sci Rep. 2014 Jul 4;4:5577. doi: 10.1038/srep05577 (PMC4894425; doi:10.1038/srep05577), 2014-07-04
Supplement: srep05577-s1.pdf [file srep05577-s1.pdf]

## Supplementary Information

# Distinguishing between cancer cell differentiation and resistance induced by all-trans retinoic acid using transcriptional profiles and functional pathway analysis

Song-Mei Liu<sup>a</sup>, Weiping Chen<sup>b</sup>, Jin Wang<sup>c,\*</sup>

<sup>a</sup> Center for Gene Diagnosis, Zhongnan Hospital of Wuhan University, Wuhan, Hubei 430071, China.

<sup>b</sup> Microarray Core, National Institute of Diabetes and Digestive and Kidney Diseases, National Institutes of Health, Bethesda, MD 20892, USA.

<sup>c</sup> Department of Translational Molecular Pathology, The University of Texas, M.D. Anderson Cancer Center, Houston, TX 77030, USA.

**Supplementary Table S1.** Differently expressed genes in resistant HL-60[R] and differentiated HL-60 cells.

| Genes/ESTs                                 | *Resistance<br>Fold change | #Differentiation<br>Fold change | Gene Bank<br>Acc No | Gene symbol |
|--------------------------------------------|----------------------------|---------------------------------|---------------------|-------------|
| proteasome 26S subunit, ATPase, 1          | 6.86                       | 0.40                            | BG829879            | PSMC1       |
| ligase I, DNA, ATP-dependent               | 6.11                       | 0.29                            | NM_000234           | LIG1        |
| retinoic acid receptor responder 2         | 4.77                       | 0.26                            | AV707399            | RARRES2     |
| transcription elongation factor A (SII), 1 | 4.28                       | 0.08                            | N41981              | TCEA1       |
| KIAA0376 protein                           | 4.08                       | 0.06                            | AB002374            | KIAA0376    |
| SKB1 homolog                               | 4.01                       | 0.04                            | BG505503            | SKB1        |
| dual specificity phosphatase 3             | 3.66                       | 0.24                            | AL555009            | DUSP3       |
| protein predicted by clone 23733           | 3.59                       | 0.16                            | AW958081            | HSU79274    |
| uracil-DNA glycosylase                     | 3.56                       | 0.13                            | NM_003362           | UNG         |
| proteasome subunit, beta type, 6           | 3.56                       | 0.29                            | BF205294            | PSMB6       |
| DEAD/H box polypeptide 1                   | 3.55                       | 0.43                            | X70649              | DDX1        |
| translocation protein 1                    | 3.39                       | 0.36                            | NM_003262           | TLOC1       |
| CD36 antigen-like 1                        | 3.37                       | 0.11                            | AL519943            | CD36L1      |
| neurofilament, heavy polypeptide           | 3.35                       | 0.44                            | X15306              | NEFH        |
| CCR4-NOT transcription complex, subunit 3  | 3.34                       | 0.18                            | NM_014516           | CNOT3       |

|                                                                        |      |       |           |          |
|------------------------------------------------------------------------|------|-------|-----------|----------|
| similar to KIAA0010 gene product                                       | 3.27 | 0.05  | AW960949  | LOC89910 |
| CD14 antigen                                                           | 3.26 | 0.41  | AL549182  | CD14     |
| flap structure-specific endonuclease 1                                 | 3.19 | 0.36  | AU142907  | FEN1     |
| cellular retinoic acid binding protein 2                               | 3.12 | 0.10  | BG832163  | CRABP2   |
| hypothetical protein FLJ12820                                          | 3.04 | 0.18  | NM_022451 | FLJ12820 |
| CTD phosphatase, subunit 1                                             | 3.04 | 0.20  | NM_004715 | CTDP1    |
| eukaryotic translation initiation factor 2                             | 2.95 | 0.23  | BG503248  | EIF2S1   |
| multimerin                                                             | 2.94 | 0.21  | NM_007351 | MMRN     |
| serologically defined colon cancer antigen 16                          | 2.87 | 0.46  | BC001149  | SDCCAG16 |
| v-myc myelocytomatosis viral oncogene homolog                          | 2.84 | 0.50  | BG256267  | MYC      |
| solute carrier family 21, member 3                                     | 2.84 | 28.14 | AF085224  | SLC21A3  |
| methylenetetrahydrofolate dehydrogenase                                | 2.77 | 0.16  | BC001014  | MTHFD1   |
| ubiquitin carrier protein                                              | 2.75 | 0.46  | AI571293  | E2-EPF   |
| similar to <i>S. pombe</i> dim1+                                       | 2.73 | 0.19  | BG686300  | DIM1     |
| zinc finger protein 263                                                | 2.73 | 0.23  | NM_005741 | ZNF263   |
| splicing factor, arginine/serine-rich 10                               | 2.72 | 0.44  | AL560128  | SFRS10   |
| splicing factor, arginine/serine-rich 3                                | 2.71 | 0.37  | BG287081  | SFRS3    |
| CDC-like kinase 2                                                      | 2.71 | 0.13  | BG286233  | CLK2     |
| ADP-ribosyltransferase                                                 | 2.69 | 0.42  | AU138067  | ADPRT    |
| prostatic binding protein                                              | 2.69 | 0.46  | BG706215  | PBP      |
| thymopoietin                                                           | 2.68 | 0.49  | U09088    | TMPO     |
| tyrosine 3-monooxygenase/tryptophan 5-monooxygenase activation protein | 2.66 | 0.41  | NM_006826 | YWHAQ    |
| golgi-specific brefeldin A resistance factor 1                         | 2.65 | 0.03  | AK025330  | GBF1     |
| FLN29 gene product                                                     | 2.63 | 0.40  | BG717965  | FLN29    |
| glucosamine-6-phosphate isomerase                                      | 2.62 | 0.25  | BE886578  | GNPI     |
| KIAA0153 protein                                                       | 2.62 | 0.32  | BC001070  | KIAA0153 |
| eukaryotic translation initiation factor 3, subunit 9                  | 2.61 | 0.49  | BG677679  | EIF3S9   |
| nucleoporin 88kD                                                       | 2.57 | 0.12  | BC000335  | NUP88    |
| amyloid precursor protein binding protein 1                            | 2.56 | 0.24  | NM_003905 | APPBP1   |
| matrin 3                                                               | 2.55 | 0.44  | BG179511  | MATR3    |
| suppressor of var1, 3-like 1                                           | 2.55 | 0.18  | BE784830  | SUPV3L1  |
| chloride channel, nucleotide-sensitive, 1A                             | 2.52 | 0.42  | AU143440  | CLNS1A   |
| tissue specific transplantation antigen P35B                           | 2.52 | 0.18  | BG673954  | TSTA3    |
| zinc finger protein 313                                                | 2.50 | 0.28  | AF131742  | ZNF313   |
| solute carrier family 16, member 1                                     | 2.49 | 0.29  | NM_003051 | SLC16A1  |
| polymerase (RNA) II polypeptide F                                      | 2.48 | 0.26  | BE389988  | POLR2F   |
| SET translocation                                                      | 2.48 | 0.06  | NM_003011 | SET      |
| runt-related transcription factor 1                                    | 2.47 | 0.26  | D43968    | RUNX1    |
| cleavage stimulation factor, 3' pre-RNA                                | 2.46 | 0.47  | NM_001325 | CSTF2    |
| ATP/GTP-binding protein                                                | 2.45 | 0.21  | AA188236  | HEAB     |
| G protein-coupled receptor kinase 6                                    | 2.44 | 0.22  | NM_002082 | GPRK6    |
| zinc finger protein 230                                                | 2.43 | 0.06  | NM_006300 | ZNF230   |
| leucine rich repeat interacting protein 1                              | 2.41 | 19.31 | BG261015  | LRRFIP1  |
| voltage-dependent anion channel 2                                      | 2.40 | 0.21  | BG178874  | VDAC2    |
| lysosomal-associated membrane protein 2                                | 2.35 | 0.50  | BG719002  | LAMP2    |
| ADP-ribosylation factor 4-like                                         | 2.33 | 0.28  | U70072    | ARF4L    |
| acetyl-Coenzyme A acetyltransferase 1                                  | 2.32 | 0.22  | NM_000019 | ACAT1    |
| GTP-binding protein homologous to <i>Saccharomyces cerevisiae</i>      | 2.30 | 0.23  | NM_006822 | SEC4L    |

| SEC4                                                                   |      |       |           |          |
|------------------------------------------------------------------------|------|-------|-----------|----------|
| phosphoenolpyruvate carboxykinase 2                                    | 2.29 | 0.17  | BC001454  | PCK2     |
| acidic 82 kDa protein mRNA                                             | 2.26 | 0.04  | BG697006  | HSU15552 |
| similar to DNA-directed RNA polymerase I                               | 2.25 | 0.20  | BC004882  | Rpo1-2   |
| X-ray repair complementing defective repair in Chinese hamster cells 5 | 2.25 | 0.37  | BE538067  | XRCC5    |
| D123 gene product                                                      | 2.25 | 0.20  | BE792735  | D123     |
| general transcription factor IIIA                                      | 2.25 | 0.21  | BG576277  | GTF3A    |
| SFRS protein kinase 1                                                  | 2.24 | 0.12  | AW958364  | SRPK1    |
| pyruvate dehydrogenase alpha 1                                         | 2.23 | 0.38  | AU130883  | PDHA1    |
| doublecortin and CaM kinase-like 1                                     | 2.22 | 0.23  | NM_004734 | DCAMKL1  |
| hypothetical protein MGC2217                                           | 2.22 | 0.19  | BE876967  | MGC2217  |
| KIAA0089 protein                                                       | 2.21 | 0.36  | BC006168  | KIAA0089 |
| polymerase (RNA) III polypeptide F                                     | 2.20 | 0.35  | AL121893  | POLR3F   |
| KIAA0543 protein                                                       | 2.19 | 0.48  | AB011115  | KIAA0543 |
| interferon gamma receptor 1                                            | 2.19 | 9.32  | J03143    | IFNGR1   |
| protein tyrosine phosphatase, receptor type, C-associated protein      | 2.19 | 0.49  | BG397566  | PTPRCAP  |
| brain abundant, membrane attached signal protein 1                     | 2.19 | 0.15  | BG398345  | BASP1    |
| ATP synthase, H <sup>+</sup> transporting, mitochondrial               | 2.18 | 0.21  | NM_001689 | ATP5G3   |
| hypothetical protein MGC19556                                          | 2.18 | 0.43  | BG830088  | MGC19556 |
| replication factor C (activator 1) 5                                   | 2.18 | 0.41  | AL532485  | RFC5     |
| phosphoglucomutase 1                                                   | 2.16 | 0.08  | BG674834  | PGM1     |
| nuclear transcription factor Y, alpha                                  | 2.15 | 0.04  | AL031778  | NFYA     |
| cadherin 17, LI cadherin                                               | 2.15 | 0.19  | NM_004063 | CDH17    |
| exonuclease 1                                                          | 2.15 | 0.30  | AC004783  | EXO1     |
| heat shock protein 75                                                  | 2.13 | 0.29  | BE901723  | TRAP1    |
| calcium channel, voltage-dependent, beta 3                             | 2.12 | 0.37  | AL565681  | CACNB3   |
| COP9 constitutive photomorphogenic homolog subunit 3                   | 2.11 | 0.21  | AA287305  | COPS3    |
| deafness, autosomal dominant 5                                         | 2.11 | 0.23  | AL035855  | DFNA5    |
| squamous cell carcinoma antigen recognised by T cells 3                | 2.10 | 0.46  | NM_014706 | SART3    |
| KIAA0614 protein                                                       | 2.10 | 0.17  | AB014514  | KIAA0614 |
| TGFB-induced factor                                                    | 2.09 | 82.00 | AL549846  | TGIF     |
| bleomycin hydrolase                                                    | 2.08 | 0.31  | AA044158  | BLMH     |
| nucleoporin 62kD                                                       | 2.07 | 0.41  | NM_016553 | NUP62    |
| heat shock 70kD protein 4                                              | 2.06 | 0.41  | BE742483  | HSPA4    |
| phosphatidylinositol 4-kinase, catalytic                               | 2.06 | 0.20  | BG025389  | PIK4CB   |
| G protein-coupled receptor, family C, group 1, member B                | 2.06 | 0.12  | BG900235  | GPRC5B   |
| KIAA0171 gene product                                                  | 2.05 | 0.07  | NM_014666 | KIAA0171 |
| sperm associated antigen 9                                             | 2.05 | 6.04  | AL043034  | SPAG9    |
| myosin ID                                                              | 2.05 | 0.34  | AI146861  | MYO1D    |
| interleukin enhancer binding factor 2, 45kD                            | 2.04 | 0.32  | AU135389  | ILF2     |
| colony stimulating factor 2 receptor, beta                             | 2.03 | 8.70  | AW959214  | CSF2RB   |
| general transcription factor IIIH                                      | 2.03 | 0.40  | NM_001516 | GTF2H3   |
| potassium voltage-gated channel, Shaw-related subfamily, member 4      | 2.03 | 0.32  | BE797730  | KCNC4    |
| NHP2 non-histone chromosome protein 2                                  | 2.02 | 0.38  | BF528185  | NHP2L1   |
| 5-methyltetrahydrofolate-homocysteine methyltransferase reductase      | 2.02 | 0.23  | NM_024010 | MTRR     |
| adenylosuccinate lyase                                                 | 2.01 | 0.37  | BE783176  | ADSL     |

|                                                                           |      |       |           |          |
|---------------------------------------------------------------------------|------|-------|-----------|----------|
| non-metastatic cells 1, protein NM23A                                     | 2.00 | 0.28  | BG753664  | NME1     |
| U3 snoRNP-associated 55-kDa protein                                       | 2.00 | 0.28  | BC010048  | U3-55K   |
| glutaminase                                                               | 0.88 | 3.39  | AF223943  | GLS      |
| hypothetical protein FLJ11560                                             | 0.50 | 0.04  | BF340474  | FLJ11560 |
| hypothetical protein MGC11061                                             | 0.50 | 3.09  | BG036183  | MGC11061 |
| RAB27A, member RAS oncogene family                                        | 0.50 | 2.30  | AW665469  | RAB27A   |
| POU domain, class 2, transcription factor 1                               | 0.50 | 8.83  | NM_002697 | POU2F1   |
| heat shock 27kD protein 2                                                 | 0.50 | 0.03  | NM_001541 | HSPB2    |
| cortistatin                                                               | 0.50 | 12.50 | AI022128  | CORT     |
| natriuretic peptide precursor A                                           | 0.50 | 4.05  | M30262    | NPPA     |
| fibrillin 1 (Marfan syndrome)                                             | 0.50 | 3.69  | NM_000138 | FBN1     |
| p53-induced protein                                                       | 0.49 | 4.50  | AL542839  | PIG11    |
| KIAA0295 protein                                                          | 0.49 | 3.56  | AI569681  | KIAA0295 |
| KIAA0625 protein                                                          | 0.49 | 9.96  | AI458143  | KIAA0625 |
| carcinoembryonic antigen-related cell adhesion molecule 6                 | 0.49 | 3.88  | AW303433  | CEACAM6  |
| dystrobrevin, alpha                                                       | 0.49 | 23.20 | AW513384  | DTNA     |
| actin related protein 2/3 complex, subunit 5                              | 0.49 | 0.11  | AL560125  | ARPC5    |
| bone morphogenetic protein receptor, type IB                              | 0.49 | 0.11  | NM_001203 | BMPR1B   |
| KIAA0763 gene product                                                     | 0.48 | 4.85  | AU143342  | KIAA0763 |
| lymphotoxin beta                                                          | 0.48 | 2.27  | AA287870  | LTB      |
| KIAA0532 protein                                                          | 0.48 | 0.10  | BG680662  | KIAA0532 |
| transglutaminase 1)                                                       | 0.48 | 0.08  | NM_000359 | TGM1     |
| p21/Cdc42/Rac1-activated kinase 1                                         | 0.48 | 2.20  | AA912798  | PAK1     |
| UDP-Gal:betaGlcNAc beta 1,4- galactosyltransferase, polypeptide 4         | 0.48 | 26.13 | AK001006  | B4GALT4  |
| 3'-phosphoadenosine 5'-phosphosulfate synthase 2                          | 0.48 | 0.01  | NM_004670 | PAPSS2   |
| elaC homolog 1                                                            | 0.48 | 0.14  | AA524364  | ELAC1    |
| PET112-like                                                               | 0.47 | 2.16  | BF195982  | PET112L  |
| sparc/osteonectin, cwcv and kazal-like domains proteoglycan               | 0.46 | 4.92  | AC005213  | SPOCK    |
| sphingosine-1-phosphatase                                                 | 0.46 | 3.91  | AI581085  | LOC81537 |
| six transmembrane epithelial antigen of the prostate                      | 0.46 | 5.00  | AF186249  | STEAP    |
| zinc finger protein 217                                                   | 0.46 | 4.01  | AA513383  | ZNF217   |
| nidogen (enactin)                                                         | 0.45 | 2.83  | NM_002508 | NID      |
| chloride channel, calcium activated, family member 1                      | 0.45 | 2.18  | AI660957  | CLCA1    |
| cleft lip and palate associated transmembrane protein 1                   | 0.45 | 4.28  | AL531509  | CLPTM1   |
| protocadherin beta 6                                                      | 0.44 | 5.00  | AA290901  | PCDHB6   |
| potassium voltage-gated channel, delayed-rectifier, subfamily S, member 3 | 0.44 | 0.14  | BC004148  | KCNS3    |
| Gardner-Rasheed feline sarcoma viral oncogene homolog                     | 0.44 | 5.53  | AI479655  | FGR      |
| KIAA1036 protein                                                          | 0.43 | 2.71  | AI811178  | KIAA1036 |
| Mid-1-related chloride channel 1                                          | 0.43 | 16.57 | AA406603  | KIAA0761 |
| interleukin 7                                                             | 0.43 | 0.14  | NM_000880 | IL7      |
| TRIAD3 protein                                                            | 0.42 | 0.07  | BF515713  | TRIAD3   |
| sterol-C4-methyl oxidase-like                                             | 0.42 | 2.29  | BG939095  | SC4MOL   |
| pinch-2                                                                   | 0.42 | 8.74  | AA570650  | LOC96626 |
| DNA-dependent protein kinase catalytic subunit-interacting protein 2      | 0.42 | 0.08  | BE042882  | KIP2     |
| sestrin 2                                                                 | 0.42 | 3.65  | AW673709  | SES2     |
| p53 regulated PA26 nuclear protein                                        | 0.41 | 4.61  | AI572037  | PA26     |
| sarcoglycan, beta                                                         | 0.40 | 0.06  | NM_000232 | SGCB     |

|                                                 |      |        |           |          |
|-------------------------------------------------|------|--------|-----------|----------|
| amylase, alpha 2B; pancreatic                   | 0.40 | 2.38   | M24895    | AMY2B    |
| potassium voltage-gated channel                 | 0.40 | 3.43   | BG760324  | KCNAB2   |
| aconitase 1, soluble                            | 0.39 | 2.70   | AI762790  | ACO1     |
| solute carrier family 12, member 7              | 0.39 | 15.25  | AW207409  | SLC12A7  |
| syntaxin 6                                      | 0.39 | 5.20   | AL527857  | STX6     |
| kallikrein 7                                    | 0.39 | 2.07   | NM_005046 | KLK7     |
| T-box 5                                         | 0.38 | 0.03   | AF221714  | TBX5     |
| sialyltransferase 8E                            | 0.38 | 2.80   | NM_013305 | SIAT8E   |
| adenomatosis polyposis coli                     | 0.37 | 6.08   | AA813571  | APC      |
| KIAA0187 gene product                           | 0.37 | 2.24   | AW205569  | KIAA0187 |
| stanniocalcin 2                                 | 0.37 | 3.53   | AB012664  | STC2     |
| holocytochrome c synthase                       | 0.37 | 0.10   | AW951033  | HCCS     |
| KIAA1441 protein                                | 0.37 | 3.93   | AL519335  | KIAA1441 |
| myosin VA                                       | 0.37 | 2.46   | NM_000259 | MYO5A    |
| mannosidase, alpha, class 1A, member 2          | 0.36 | 3.48   | N30111    | MAN1A2   |
| albumin                                         | 0.34 | 2.90   | AI383957  | ALB      |
| H1 histone family, member X                     | 0.33 | 3.49   | BE746713  | H1FX     |
| thioredoxin interacting protein                 | 0.32 | 141.60 | AU139227  | TXNIP    |
| short-chain alcohol dehydrogenase family member | 0.32 | 4.43   | NM_005794 | HEP27    |
| CMRF35 leukocyte immunoglobulin-like receptor   | 0.30 | 7.06   | NM_006678 | CMRF35   |
| four and a half LIM domains 3                   | 0.30 | 2.13   | BF220053  | FHL3     |
| SNARE protein                                   | 0.30 | 0.05   | AI432607  | YKT6     |
| plexin B3                                       | 0.29 | 2.75   | AF149019  | PLXNB3   |
| sphingomyelin phosphodiesterase 1               | 0.28 | 0.08   | NM_000543 | SMPD1    |
| protein kinase, cGMP-dependent, type I          | 0.27 | 16.50  | NM_006258 | PRKG1    |
| hypothetical protein SP192                      | 0.27 | 2.15   | NM_021639 | SP192    |
| forkhead box F1                                 | 0.26 | 3.13   | NM_001451 | FOXF1    |
| peroxisomal acyl-CoA thioesterase               | 0.24 | 2.20   | AI628256  | PTE1     |
| hypothetical protein FLJ20535                   | 0.23 | 5.90   | AU159187  | FLJ20535 |
| epidermal growth factor receptor                | 0.22 | 0.02   | NM_005228 | EGFR     |
| synovial sarcoma, X breakpoint 3                | 0.22 | 0.03   | BC005904  | SSX3     |
| nucleosome assembly protein 1-like 3            | 0.22 | 3.25   | NM_004538 | NAP1L3   |
| zinc finger protein 161                         | 0.22 | 8.79   | AA195154  | ZNF161   |
| KIAA0551 protein                                | 0.21 | 2.28   | AB011123  | KIAA0551 |
| short-chain dehydrogenase/reductase 1           | 0.20 | 311.64 | AI858402  | SDR1     |
| kallikrein B, plasma (Fletcher factor) 1        | 0.18 | 3.01   | AW471415  | KLKB1    |
| heat shock protein 75                           | 0.17 | 3.32   | AI652114  | TRAP1    |
| myeloid differentiation primary response gene   | 0.17 | 5.02   | AW965179  | MYD88    |
| KIAA1535 protein                                | 0.17 | 2.67   | AW243139  | KIAA1535 |
| apolipoprotein C-II                             | 0.15 | 3.25   | AV725009  | APOC2    |
| plasminogen activator, urokinase receptor       | 0.12 | 0.04   | AL554548  | PLAUR    |
| solute carrier family 21, member 9              | 0.05 | 3.20   | N63052    | SLC21A9  |
| MHC class I region ORF                          | 0.03 | 3.40   | NM_006674 | P5-1     |
| RE1-silencing transcription factor              | 0.01 | 3.77   | NM_005612 | REST     |

\*HL-60[R] cells maintained in 1.0  $\mu$ M *ATRA* for 6 months compared to parental HL-60 cells.

#HL-60 cells treated with 1.0  $\mu$ M *ATRA* for 6 days compared to untreated HL-60 cells.
